# Supplementary material for: Serum 1,5-anhydroglucitol level as a screening tool for diabetes mellitus in a community-based population at high risk of diabetes
Source: Springer Nature journal article supplement (doi:10.1007/s00592-016-0944-z), 2016-11-28
Supplement: MOESM2 [file 11096748]

**Serum 1,5-anhydroglucitol level as a screening tool for diabetes mellitus in a community-based population at high risk for diabetes**

Yao Wang1, Yuexing Yuan1, Yanli Zhang2, Chenghao Lei2, Yi Zhou2, Jiajia He2, Zilin Sun1,2*

1Department of Endocrinology, Zhongda Hospital Southeast University, Nanjing, China

2Department of Endocrinology, Medical School of Southeast University, Nanjing, China

***Corresponding author:**

Zilin Sun

Department of Endocrinology, Zhongda Hospital, Institute of Diabetes, Medical School, Southeast University, No. 87 Dingjiaqiao Road, Nanjing, Jiangsu Province 210009, China.

Tel: +86-13851545593

Fax: +86-21-64085875

E-mail: [sunzilin1963@126.com](mailto:sunzilin1963@126.com)

**Online Resource 2. Clinical characteristics of participants divided into DM, IGR, and NGT groups.**

| Characteristics | DM (n=298) | IGR (n=271) | NGT (n=601) | *P*-value |
| --- | --- | --- | --- | --- |
| Age (years) | 62.00(54.00~69.00) | 61.00(55.00~69.00) * | 58.50(52.00~65.00) # | <0.001 |
| BMI (kg/m2) | 24.84(22.32~24.83) | 24.95(23.29~27.63) * | 23.51(21.50~25.39) # | 0.017 |
| WHR | 0.91(0.86~0.96) | 0.89(0.85~0.93) * | 0.86(0.81~0.90) #& | <0.001 |
| FBG (mmol/L) | 7.10(6.00~8.06) | 5.85(5.21~6.40) * | 5.09(4.69~5.45) #& | <0.001 |
| PBG (mmol/L) | 12.50(10/30~15.07) | 8.43(7.87~9.46) * | 5.93(5.11~6.69) #& | <0.001 |
| HbA1c (%) | 7.4(6.6~8.9) | 6.1(5.8~6.4) * | 5.7(5.5~6.0) #& | <0.001 |
| 1,5-AG (ug/ml) | 4.82(2.61~6.77) | 13.49(9.58~16.46) * | 23.31(16.77~29.83) #& | <0.001 |

DM, diabetes mellitus; IGR, impaired glucose regulation; NGT, normal glucose tolerance; BMI: Body Mass Index; WHR: waist to hip ratio; FBG, fasing blood glucose; PBG, postprandial blood glucose; HbA1c, hemoglobin A1c; 1,5-AG, 1,5-anhydroglucitol

Continues data are expressed as medians (interquartile ranges).

***** *P*-value <0.01 IGR compared with DM using Kruskal-Wallis H test with adjusted *P*-value of 0.017 indicative of significance.

**#** *P*-value <0.01 NGT compared with IGR using Kruskal-Wallis H test with adjusted *P*-value of 0.017 indicative of significance.

**&** *P*-value <0.01 NGT compared with DM using Kruskal-Wallis H test with adjusted *P*-value of 0.017 indicative of significance.
