# Supplementary material for: Serum 1,5-anhydroglucitol level as a screening tool for diabetes mellitus in a community-based population at high risk of diabetes
Source: Springer Nature journal article supplement (doi:10.1007/s00592-016-0944-z), 2016-11-28
Supplement: MOESM6 [file 11096748]

**Serum 1,5-anhydroglucitol level as a screening tool for diabetes mellitus in a community-based population at high risk for diabetes**

Yao Wang1, Yuexing Yuan1, Yanli Zhang2, Chenghao Lei2, Yi Zhou2, Jiajia He2, Zilin Sun1,2*

1Department of Endocrinology, Zhongda Hospital Southeast University, Nanjing, China

2Department of Endocrinology, Medical School of Southeast University, Nanjing, China

***Corresponding author:**

Zilin Sun

Department of Endocrinology, Zhongda Hospital, Institute of Diabetes, Medical School, Southeast University, No. 87 Dingjiaqiao Road, Nanjing, Jiangsu Province 210009, China.

Tel: +86-13851545593

Fax: +86-21-64085875

E-mail: [sunzilin1963@126.com](mailto:sunzilin1963@126.com)

a: HbA1c b: 1,5-AG


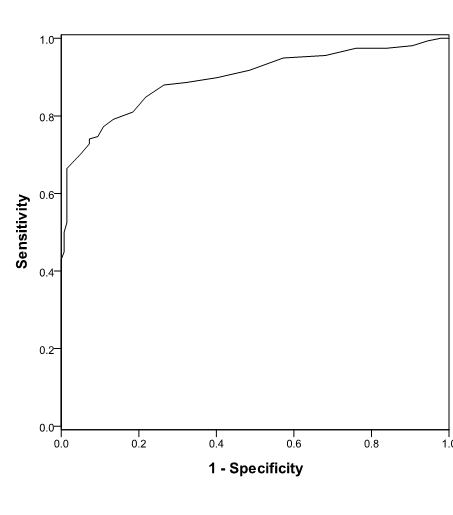

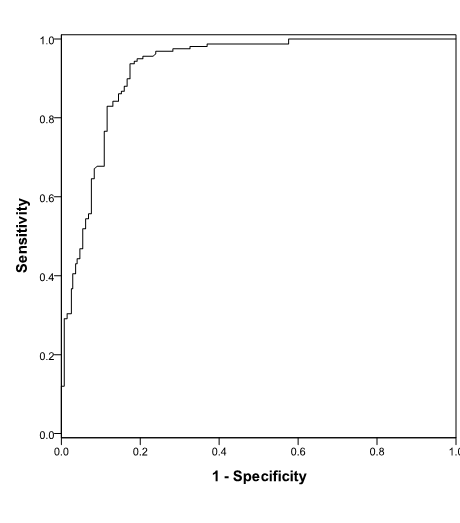


**Online Resource 6. Diagnostic values of HbA1c and 1,5-AG in men subjects.**

HbA1c, hemoglobin A1c; 1,5-AG, 1,5-anhydroglucitol

Online Resource 6(a) shows the diagnostic accuracies of HbA1c for undiagnosed diabetes, and Online Resource 6(b) represents the diagnostic accuracy of 1,5-AG. The area under the curve was 0.897 for HbA1c and 0.924 for 1,5-AG, with the respective cut-off value in identifying diabetes 6.80%, and 11.37 μg/ml.
